# Supplementary material for: European Sudden Cardiac Arrest network: towards Prevention, Education and New Effective Treatments (ESCAPE-NET)
Source: Oxford University Press journal article supplement (doi:10.1093/eurheartj/ehx758), 2018-01-07
Supplement: ehx758_supp_data.docx [file ehx758_supp_data.docx]

**European Sudden Cardiac Arrest network: towards Prevention, Education and New Effective Treatments (ESCAPE-NET) – supplementary data**

**Table 1.** The ESCAPE-NET consortium

| **NAME** | | **COUNTRY** | **ROLE** |
| --- | --- | --- | --- |
| ***Academic partners*** | | | |
| Academic Medical Center (Project Coordinator Dr. Tan) | | The Netherlands | Cohort, clinical studies |
| University of Copenhagen | | Denmark | Cohort, clinical studies |
| Université Paris Descartes | | France | Cohort, clinical studies |
| University of Pavia and IRCCS Istituto Auxologico Italiano | | Italy | Cohort, clinical studies |
| VU University Medical Center | | The Netherlands | Cohort, clinical studies |
| Karolinska Institute | | Sweden | Cohort, clinical studies |
| Emergency Medical Services of the Hradec Kralove Region | | Czech Republic | Cohort, clinical studies |
| Istituto di Ricerche Farmacologiche “Mario Negri” | | Italy | Cohort, clinical studies |
| Helmholtz Zentrum München | | Germany | Genotyping |
| Fundació Institut Mar d'Investigacions Mèdiques | | Spain | Pharmacological analysis |
| ***European scientific societies/associations for SCA research*** | | | |
| European Society of Cardiology (ESC), representing the European Heart Rhythm Association (EHRA) | France | | Dissemination, Education, Implementation |
| European Resuscitation Council (ERC) | Belgium | | Dissemination, Education, Implementation |
| ***Small and medium sized enterprises*** | | | |
| Panaxea BV | The Netherlands | | Health Economics analysis |
| BC Platforms Ltd. | Finland | | Bioinformatics platform |
| Catalyze BV | The Netherlands | | Project management |

**Table 2**: SCA cohorts.

| **Name** | **Partner** | **Country** | **Cause of SCA** | **SCA cases (N)** | **DNA samples (N)** |
| --- | --- | --- | --- | --- | --- |
| ARREST | AMC | NL | all-cause | 13786 | 4473 |
| AGNES | AMC | NL | first myocardial infarction | 1023 | 1023 |
| Cartagene | UP | FR | all-cause | 2332 | 1518 |
| Paris Sudden Death Expertise | UP | FR | all-cause | 10093 | none |
| Danish Cardiac Arrest registry | REGIONH | DK | all-cause | 47000 | 6000 |
| SCDY in Denmark | REGIONH | DK | all-cause | 1463 | 140 |
| GEVAMI | REGIONH | DK | first myocardial infarction | 1100 | 1100 |
| Predestination | UPAV, AUXO | IT | first myocardial infarction | 341 | 341 |
| Stockholm Region | KI | SE | all-cause | 6100 | none |
| EMS Hradec Kralove Region | EMS | CZ | all-cause | 1779 | none |
| RIAC | IRFMN | IT | all-cause | 773 | none |
| **TOTAL** |  |  |  | **85790** | **14595** |

**Table 3:** Observational prospective population cohorts.

| **Name** | **Partner** | **Country** | **Population type** | **Persons followed (N)** | **SCA cases (N)** | **DNA** |
| --- | --- | --- | --- | --- | --- | --- |
| Paris Prospective Study 3 | UP | FR | general population | 10157 | 130 | 3800 |
| Copenhagen City Heart Study | REGIONH | DK | general population | 24000 | 2000 | none |
| Hoorn studies | VUMC | NL | general population | 5237 | 190 | 3953 |
| Diabetes Pearl | VUMC | NL | diabetes mellitus | 6666 | to be determined | 6666 |
| Diabetes Care System | VUMC | NL | diabetes mellitus | 7000 | 240 | 6000 |
| **TOTAL** |  |  |  | **53060** | **2560** | **20419** |

**Acknowledgments**

The ESCAPE-NET Investigators are:

*AMC*: Marieke A.R. Bak, Stefanie G. Beesems, Connie R. Bezzina, Marieke T. Blom, Sanne Brands, Laura H.P.I. van Dongen, Talip E. Eroglu, Corina de Graaf, Frank J.M. Groen, Sandra C.M. de Haas, Peter Henneman, Petronella C.M. Homma, Rudolph. W. Koster, Anton M. Kunst, Elisabeth M. Lodder, Marcel M.A.M. Mannens, Benjamin P. van Nieuwenhuizen, Iris Oving, Johannes L. van Schuppen, Remy Stieglis, Hanno L. Tan, Michael W. Tanck, Irene G.M. van Valkengoed, Arthur A.M. Wilde, Dick L. Willems, Aeilko H. Zwinderman

*REGIONH*: Frederik Ågesen, Fredrik Folke, Gunnar Gislason, Charlotte Glinge, Reza Jabbari, Freddy K. Lippert, Thomas Lynge, Jacob Tfelt-Hansen, Bo Gregers Winkel

*UP*: Jean-Philippe Empana, Xavier Jouven

*UPAV*: Veronica Dusi, Gaetano de Ferrari

*AUXO*: Lia Crotti, Peter J. Schwartz

*VUMC*: Jacqueline M. Dekker, Petra Elders, Leen M ‘t Hart, Amber A. van der Heijden, Giel Nijpels, Sabrina Welten

*KI*: Ellinor Berglund, Martin Jonsson, Leif Svensson

*EMS*: Jiri Masek, Anatolij Truhlar

*IRFMN*: Francesca Fumagalli, Roberto Latini, Giuseppe Ristagno, Federico Semeraro (Italian Resuscitation Council)

*HMGU*: Peter Lichtner, Elisa Mastantuono, Thomas Meitinger

*IMIM*: Xavier Jalencas, Jordi Mestres

*ESC*: Nikolaos Dagres, Gerhard Hindricks

*ERC*: Bernd W. Bӧttiger, Jeroen Janssens

*PANAXEA*: Anam Ahmed, Daan Mathijssen, Isabelle Nefkens

*BC Platforms*: Niko Hurskainen, Timo Kanninen, Päivi Tikka-Kleemo

*Catalyze*: Tim van Beelen
